# Supplementary material for: Native Brazilian fruits: postprandial glycemic control and carbohydrate-enzyme inhibition – insights from a randomized crossover clinical trial
Source: Royal Society of Chemistry journal article supplement (doi:10.1039/d4fo03749a), 2025-01-01
Supplement: d4fo03749a1.xlsx [file d4fo03749a1.xlsx]

## Sheet: Sheet1
GLYCEMIA
AUC glycemia						T0h glycemia						T15 glycemia						T30 glycemia						T45 glycemia						T60 glycemia						T90 glycemia						T120 glycemia
	Bread	Grumixama	RG cherry	Uvaia			Bread	Grumixama	RG cherry	Uvaia			Bread	Grumixama	RG cherry	Uvaia			Bread	Grumixama	RG cherry	Uvaia			Bread	Grumixama	RG cherry	Uvaia			Bread	Grumixama	RG cherry	Uvaia			Bread	Grumixama	RG cherry	Uvaia			Bread	Grumixama	RG cherry	Uvaia
1	1536	1095	375	1418		1	82	86	85	82		1	76.5	85	81.5	83		1	110.5	109.5	85	100.5		1	109.5	110	91.5	122		1	101	100.5	89	101		1	87.5	86.5	90.5	82		1	88.5	87	85	88
2	1379	1485	563	1253		2	77	74	72	69		2	77.5	66.5	79	69.5		2	113	82.5	75	91		2	105.5	91	83.5	84		2	95.5	105.5	88	91.5		2	74	84.5	74.5	74		2	72.5	79	79.5	70
3	834.4	1050	846	1860		3	84.5	90	95.5	88		3	87.5	89	91.5	87		3	113.5	114	118.5	123.5		3	106	104	118	112.5		3	87.5	97	101.5	113		3	79.5	99	98.5	99.5		3	84.5	94	90.5	90
4						4						4						4						4						4						4						4
5	1733	1133	1140	1328		5	69.5	74.5	76.5	88		5	83.5	84.5	81.5	92.5		5	91.5	94.5	88	112		5	95	80.5	90.5	111		5	76.5	95.5	102.5	103		5	88	76	79	96.5		5	78	81	80	81
6						6						6						6						6						6						6						6
7	1369	1185	465	1290		7	79.5	79.5	70.5	73		7	83.5	95	79.5	73		7	91	106	88	94		7	99	92.5	75.5	107.5		7	108	90	71	92		7	81.5	85.5	68.5	74		7	74.5	77	72	71.5
8	1167	758	490	1254		8	77	69	85.5	85		8	72.5	73.5	97	82.5		8	99.5	82.5	94	108		8	91.5	86	91	108.5		8	93.5	80	91	110		8	84	78	87	84.5		8	79	78.5	79.5	68.5
9	1635	1673	1171	1680		9	80.5	79	76.5	78.5		9	86	79	80.5	83		9	117.5	88.5	87	89.5		9	108	98.5	87	107.5		9	96.5	120	94.5	113		9	88	87.5	90.5	86		9	83	81	76	82
10	1218	607	705	1349		10	77	91	83.5	83		10	80	82.5	86	87		10	102	92.5	91.5	99		10	102.5	104	89	110		10	81.5	102.5	93.5	113.5		10	84	96.5	91.5	79		10	66	81	85	79.5
11	953	879	428	504		11	83	88	87	87		11	84.5	92.5	92	82.5		11	97.5	97	93	98		11	96	104.5	86.5	99.5		11	96	95	92	82.5		11	88.5	97	89.5	92.5		11	84.5	86.5	90.5	89.5
12	1770	1133	983	972		12	87	75	98	73		12	89.5	78	97	77.5		12	124.5	90	107	98.5		12	113	88	108.5	108.5		12	102.5	80	125.5	84.5		12	96.5	89.5	99	76.5		12	94	81.5	99.5	81.5
13	918.5	1014	1088	1145		13	90	84	86.5	85		13	94.5	83	93.5	70		13	111.5	96.5	119.5	96.5		13	109.5	101	99.5	120		13	98	101	96	107.5		13	92	88	89.5	83		13	75	80.5	86.5	66.5
14	2926	1966	574	1713		14	80	88.5	91	83		14	77.5	85	86	84		14	110.5	99	93	102		14	129.5	119.5	99	107.5		14	113.5	116	105	109		14	112	110	97	99		14	79.5	98	79	81
15	1410	1898	1148	578		15	68.5	66.5	78	78		15	73.5	71	78.5	77.5		15	91	83.5	100.5	102		15	96.5	102	96	93		15	80.5	93.5	95.5	76.5		15	75	76	82.5	69		15	77.5	78.5	72.5	68
INSULIN
AUC insulin						T0h insulin						T30 insulin						T60 insulin						T120 insulin
	Bread	Grumixama	RG cherry	Uvaia			Bread	Grumixama	RG cherry	Uvaia			Bread	Grumixama	RG cherry	Uvaia			Bread	Grumixama	RG cherry	Uvaia			Bread	Grumixama	RG cherry	Uvaia
1	6364*	5175*	8486*	5692*		1	21.695652173913*	19.9565217391304*	23.9358974358974*	27.525641025641*		1	81.8405797101449*	43.2898550724638*	52.0128205128205*	59.4487179487179*		1	43.7246376811594*	51.9855072463768*	108.166666666667*	53.6794871794872*		1	53.8695652173913*	41.2608695652174*	56.6282051282051*	35.9871794871795*
2	2958	2762	5213	3630		2	22.8551	18.942	22.5256	16.6282		2	31.5507	19.3768	42.0128	36.2436		2	26.7681	32.1304	57.2692	39.4487		2	15.4638	15.029	34.5769	17.2692
3	2901	3454	3763	3999		3	15.3188	15.6087	19.9615	17.9103		3	38.3623	39.2319	44.8333	35.7308		3	21.8406	31.1159	32.3974	40.7308		3	17.9275	21.4058	22.0128	27.5256
4	3258	1753	2907	2924		4	15.1739	12.1304	16.2436	17.3974		4	42.4203	18.0725	26.2436	30.3462		4	28.6522	16.0435	25.4744	28.5513		4	15.6087	10.2464	24.3205	15.6026
5	3201	2343	5069	3899		5	25.4638	17.058	21.1154	19.0641		5	37.2029	19.8116	48.9359	49.4487		5	25.3188	22.2754	53.6795	32.9103		5	18.7971	16.3333	28.9359	21.6282
6	9184*	8380*	8615*	4486*		6	25.0289855072464*	17.3478260869565*	34.9615384615385*	17.7820512820513*		6	106.043	75.6087	89.0641	47.0128		6	95.3188405797101*	45.0289855072464*	80.6025641025641*	38.4230769230769*		6	44.5942028985507*	127.492753623188*	59.7051282051282*	35.9871794871795*
7	10785	10485	9705	10755		7	16.913	18.6522	25.859	20.7308		7	68.3623	17.4928	48.4231	41.6282		7	38.0725	40.5362	35.4744	29.8333		7	18.942	23.2899	24.0641	24.1923
8	2869	1967	2813	2613		8	21.9855	20.8261	19.1923	16.2436		8	31.4058	18.6522	29.8333	28.4231		8	28.6522	16.3333	25.2179	22.2692		8	10.2464	11.9855	16.5	17.141
9	4964	5330	4245	5136		9	19.6667	30.2464	21.7564	22.5256		9	81.8406	38.3623	40.3462	45.0897		9	37.3478	71.9855	47.6538	55.2179		9	17.7826	16.1884	18.8077	32.0128
10	2260	3349	2942	3901		10	11.5507	12.5652	16.7564	16.5		10	40.3913	27.7826	26.1154	34.7051		10	14.1594	43.7246	29.3205	45.3462		10	7.92754	11.9855	19.5769	19.0641
CYTOKINES
IL-1B						IL-6
	Bread	Grumixama	RG cherry	Uvaia			Bread	Grumixama	RG cherry	Uvaia
1	17,85	-12,44	-6,01	3,09		1	0,65	-0,35	0,34	-4,44*
2	5,21	6,41	-1,78	2,66		2	-0,25	0,09	-0,1	0,32
3	15,79	-2,73	37,95	2,34		3	0,4	1,94	-0,24	-0,48
4	-37,22	5,53	7,57	12,44		4	-0,22	0,4	0,22	-0,22
5	36,67	13,47	-20,17	3,76		5	8,69*	-0,84*	-0,74*	-3,95*
6	88,98*	-15,13*	117,28*	-18,82*		6	-0,5*	0,23*	-0,31*	-0,03*
7	356,51*	97,48*	-59,57*	7,6*		7	0	-0,54	-0,33	0,23
8	34,6	19,94	16,71	13,49		8	0,25	-0,47	1,4	0
9	43,6	36,71	18,03	-6,68		9	0,53	-0,4	-0,56	0,1
10	19,48	-53,75	-14,6	5,83		10	-0,25	0	-0,9	0
ENZYMATIC INHIBITION
alpha-amylase						alpha-glucosidase
	Acarbose	Grumixama	RG cherry	Uvaia			Acarbose	Grumixama	RG cherry	Uvaia
	100	57.1926	56.3883	32.77			100	74.5246	53.6594	30.5235
	100	53.8386	58.3792	29.23			100	67.1548	56.9239	31.6754
	100	58.0059	60.2797	36.32			100	70.2137	53.7065	24.0314
DELTA
AUC glycemia	median	%
Bread	1379	100
Grumixama	1133	17.839
Cereja RG	705	48.876
Uvaia	1290	6.45395
Glicose 30`	median	%
Bread	111	100
Grumixama	95	14.4144
Cereja RG	93	16.2162
Uvaia	99	10.8108
Glicose 45`	mean	%
Bread	105	100
Grumixama	98.77	5.93333
Cereja RG	93.77	10.6952
Uvaia	107.3	-2.19048
Insulina 30`	median	%
Bread	39.38	100
Grumixama	19.59	50.2539
Cereja RG	41.18	-4.57085
Uvaia	35.99	8.60843
